# Supplementary material for: Timing outweighs amount of rainfall in shaping population dynamics
Source: Research Square preprint supplement (doi:10.21203/rs.3.rs-90221/v1), 2020-10-14
Supplement: Supplementary file 1 [file e25b349c68a292f4181d34b7.docx]

**Supplementary Materials**

**
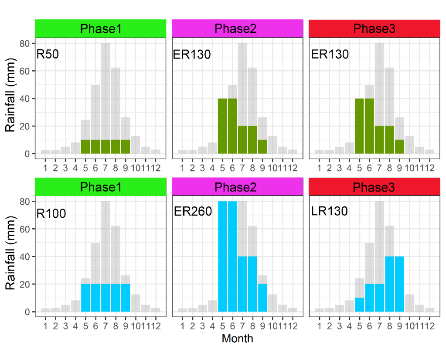
**

**Fig. S1** Various rainfall increase scenarios in enclosure experiments on the population dynamics of Brandt's voles from 2010-2019. Gray bars indicate the average monthly rainfall in our study site from 1960-2017. Different lengths of colored bars represent the added rainfall amount in the growing season.
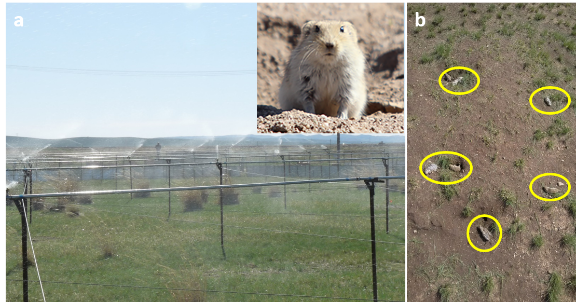


**Fig. S2** Photos of the irrigation system and the dead Brandt’s voles shown in yellow circles after the thunderstorm, presumably having been drowned.


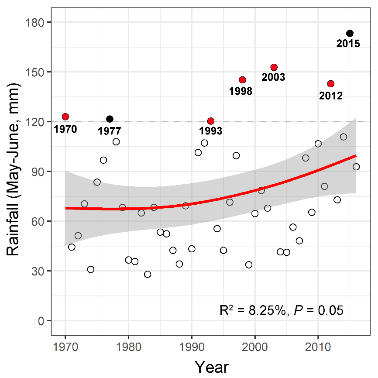


**Fig. S3** The amount of rainfall during May and June. The solid points represent the years when the rainfall during May and June reached over 120 mm (i.e. the amount of rainfall in ER130 treatment). Red points indicate high density populations (> 300 individuals per hectare) of Brandt’s vole, while black points indicate low density populations. The identification of the population outbreak threshold was obtained from field investigations (unpublished) from Xinrong Wan and some older Chinese literature, with 300 individuals per hectare taken as the outbreak threshold.


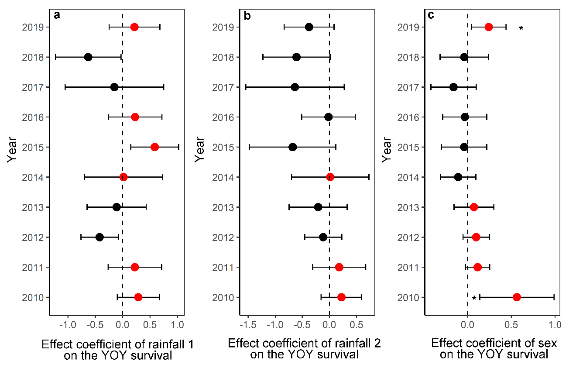


**Fig. S4** Effects of rainfall increase (Rainfall 1: R50, ER130; Rainfall 2: R100, ER260 and LR130) and sex on the survival rate of yearlings of Brandt’s vole from 2010 to 2019. The asterisks denote significant differences. Red points represent positive coefficient values and black ones represent negative coefficient values.


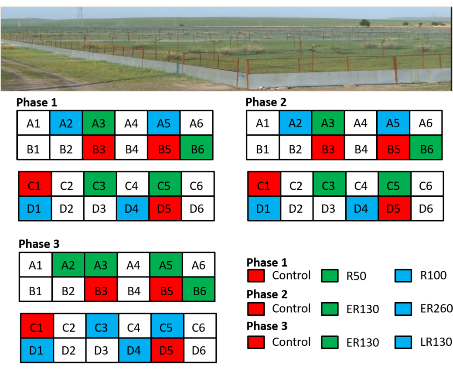


**Fig. S5** A photo of one rainfall increase enclosure (plot B6) and layout of the 0.48-ha enclosures for different rainfall treatments in our study from 2010 to 2019. Each rectangle represents an experimental enclosure. In phase 3, to exclude the carry-over effect of different amount of rainfall increase, we combined two enclosures in the ER130 treatment and two enclosures in the ER260 treatment into the ER130 treatment and the LR130 treatment respectively.

| Phase | Year | Levels of rainfall increase/mm | | Natural rainfall/mm | Percentage increase | |
| --- | --- | --- | --- | --- | --- | --- |
| Low/ER | Moderate/LR | Low/ER | Moderate/LR |
| Phase1 | 2010 | 50 | 100 | 186.3 | 26.80% | 53.70% |
| 2011 | 50 | 100 | 226.7 | 22.05% | 44.11% |
| 2012 | 50 | 100 | 511.7 | 9.77% | 19.54% |
| 2013 | 50 | 100 | 273.4 | 18.29% | 36.58% |
| 2014 | 50 | 100 | 255.9 | 19.54% | 39.08% |
| 2015 | 50 | 100 | 412.8 | 12.11% | 24.22% |
|  |  |  |  |  |  |  |
| Phase2 | 2016 | 130 | 260 | 308.4 | 42.15% | 84.31% |
| 2017 | 130 | 260 | 168.9 | 76.97% | 153.94% |
| 2018 | 130 | 260 | 263.1 | 49.41% | 98.82% |
|  |  |  |  |  |  |  |
| Phase3 | 2019 | 130 | 130 | 298.6 | 43.54% | 43.54% |

**Table S1** A annual rainfall amount at our study site in Inner Mongolia, China, from 2010 to 2019 and percentage increases in enclosures where rain was experimentally added compared with the natural rainfall in the control enclosures. Low level added rainfall = 50 mm, moderate level added rainfall = 100 mm (2010–2015); low level added rainfall = 130 mm, moderate level added rainfall = 260 mm (2016–2018); these experimental additions of rain took place during the growing season (May - September). ER = 130 mm additional rainfall provided mostly in the early plant growing season (May - June), and LR = 130 mm additional rainfall provided mostly later in the plant growing season (July - September) (2019).

**Table S2** Overall rainfall treatment effect of rainfall addition experiments on the population density, numbers of recruits, and body mass of yearling Brandt's voles in October, and plant biomass (of plants preferred and less-preferred as food by voles) indicated by mixed model analyses. Numbers in bold font indicate significant results.

| Phases | Year | Population density | |  | Recruits | |  | Body mass | |  | Preferred plants | |  | Less preferred plants | |
| --- | --- | --- | --- | --- | --- | --- | --- | --- | --- | --- | --- | --- | --- | --- | --- |
| F(2, 9) value | P value |  | F(2, 9) value | P value |  | F(2, 9) value | P value |  | F(2, 9) value | P value |  | F(2, 9) value | P value |
| Phase 1 | 2010 | 1 | 0.4 |  | 1.05 | 0.39 |  | 3.86 | 0.08 |  | 0.45 | 0.65 |  | 1.5 | 0.27 |
| 2011 | 0.66 | 0.54 |  | 0.6 | 0.57 |  | 1.39 | 0.3 |  | 0.92 | 0.43 |  | 0.84 | 0.46 |
| 2012 | 0.008 | 0.99 |  | 0.12 | 0.89 |  | 0.47 | 0.64 |  | 0.74 | 0.5 |  | 0.04 | 0.96 |
| 2013 | 0.02 | 0.98 |  | 0.02 | 0.98 |  | 0.3 | 0.75 |  | 1.59 | 0.26 |  | 0.006 | 0.99 |
| 2014 | 0.07 | 0.94 |  | 0.1 | 0.9 |  | 0.24 | 0.79 |  | 1.78 | 0.22 |  | 4.1 | 0.052 |
| 2015 | 0.21 | 0.81 |  | 1.44 | 0.29 |  | 0.05 | 0.84 |  | 3.52 | 0.07 |  | 0.44 | 0.66 |
| Phase 2 | 2016 | 4.2 | **0.05** |  | 6.76 | **0.02** |  | 5.5 | **0.028** |  | 4.6 | **0.042** |  | 1.22 | 0.34 |
| 2017 | 4.8 | **0.04** |  | 11 | **0.004** |  | 6.6 | **0.017** |  | 4.87 | **0.037** |  | 0.94 | 0.43 |
| 2018 | 5.4 | **0.03** |  | 6.2 | **0.02** |  | 6.2 | **0.02** |  | 4.78 | **0.038** |  | 1.52 | 0.27 |
| Phase 3 | 2019 | 7.8 | **0.01** |  | 4.8 | **0.04** |  | 7.1 | **0.014** |  | 4.5 | **0.044** |  | 2.43 | 0.14 |

**Table S3** Overall rainfall treatment effect of rainfall addition experiments on the survival of the overwintered and yearling Brandt's voles (Rainfall 1: R50, ER130; Rainfall 2: R100, ER260 and LR130). Numbers in bold font indicate significant results.

| Phases | Year | The overwintered | | | | |  | Yearlings | | | | |
| --- | --- | --- | --- | --- | --- | --- | --- | --- | --- | --- | --- | --- |
| Rainfall 1 | |  | Rainfall 2 | |  | Rainfall 1 | |  | Rainfall 2 | |
| Z value | P value |  | Z value | P value |  | Z value | P value |  | Z value | P value |
| Phase 1 | 2010 | -2.1 | **0.036** |  | -3.7 | **<0.001** |  | 1.49 | 0.14 |  | 1.2 | 0.24 |
| 2011 | -1.26 | 0.21 |  | 0.17 | 0.87 |  | 0.91 | 0.36 |  | 0.74 | 0.46 |
| 2012 | 0.48 | 0.62 |  | -0.29 | 0.77 |  | -1.45 | 0.16 |  | -0.11 | 0.5 |
| 2013 | 0.44 | 0.66 |  | 0.24 | 0.81 |  | -0.41 | 0.68 |  | -0.78 | 0.44 |
| 2014 | -1.72 | 0.086 |  | -1.62 | 0.1 |  | 0.05 | 0.96 |  | 0.044 | 0.965 |
| 2015 | -1.64 | 0.1 |  | -3.37 | **<0.001** |  | 0.48 | 0.63 |  | -0.008 | 0.993 |
| Phase 2 | 2016 | -1.93 | **0.05** |  | -2.43 | **0.015** |  | 0.93 | 0.35 |  | -0.072 | 0.94 |
| 2017 | 0.78 | 0.44 |  | -2.4 | **0.016** |  | -0.33 | 0.74 |  | -1.4 | 0.16 |
| 2018 | 0.17 | 0.87 |  | 0.66 | 0.51 |  | -1.1 | 0.23 |  | -1.76 | 0.13 |
| Phase 3 | 2019 | -3.1 | **0.0002** |  | 0.273 | 0.78 |  | 0.93 | 0.35 |  | -1.63 | 0.1 |
